# Supplementary material
Source: Springer Nature journal article supplement (https://www.springermedizin.de/resource/supplementary/12913_2008_993_MOESM11_ESM.pdf/9536098)

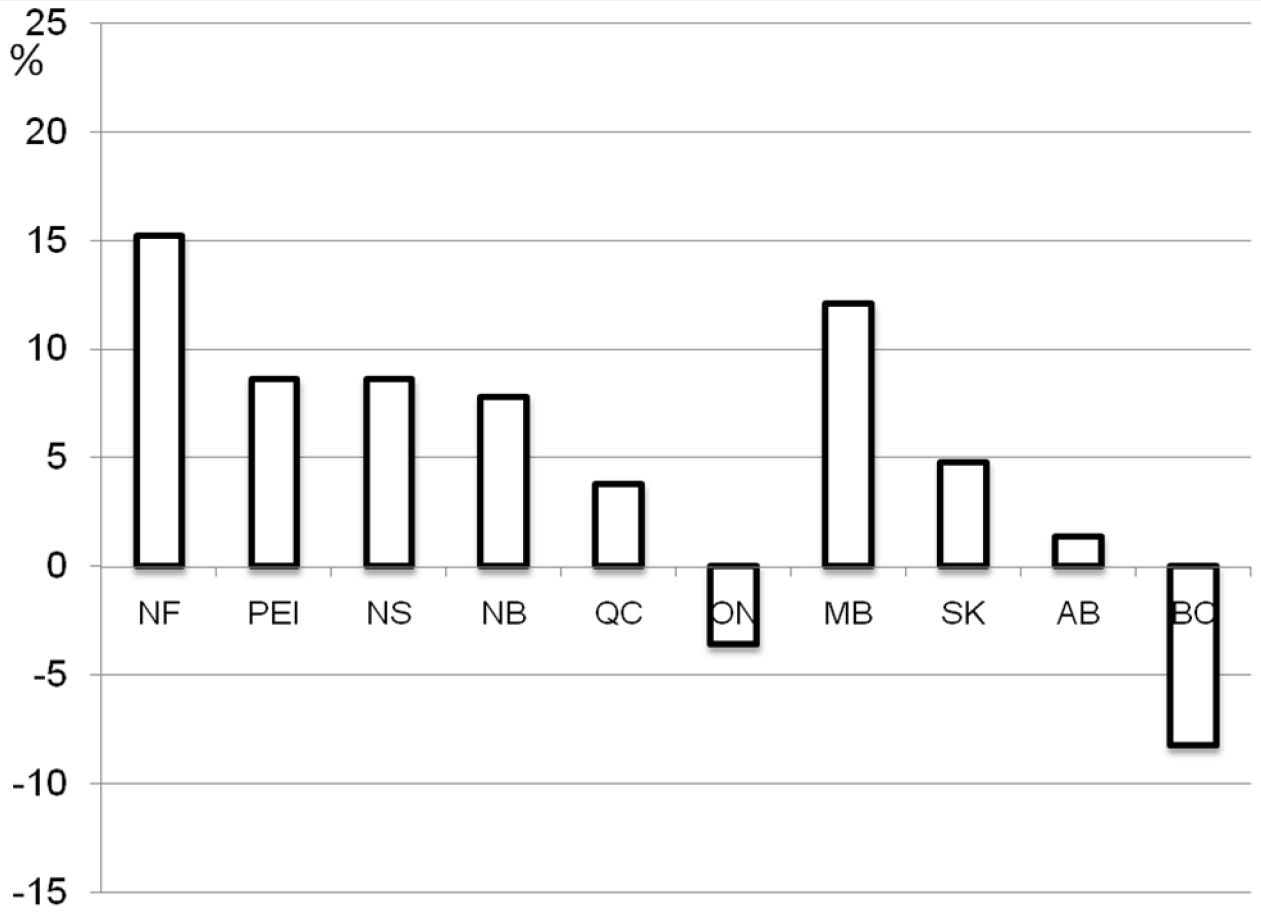

Supplement: MOESM11 [file 9536098]
